# Supplementary material for: The Impact of Genetic Susceptibility to Systemic Lupus Erythematosus on Placental Malaria in Mice
Source: PubMed Central journal article supplement (PMC3651086; doi:10.1371/journal.pone.0062820), 2013-05-10

# Figure S1

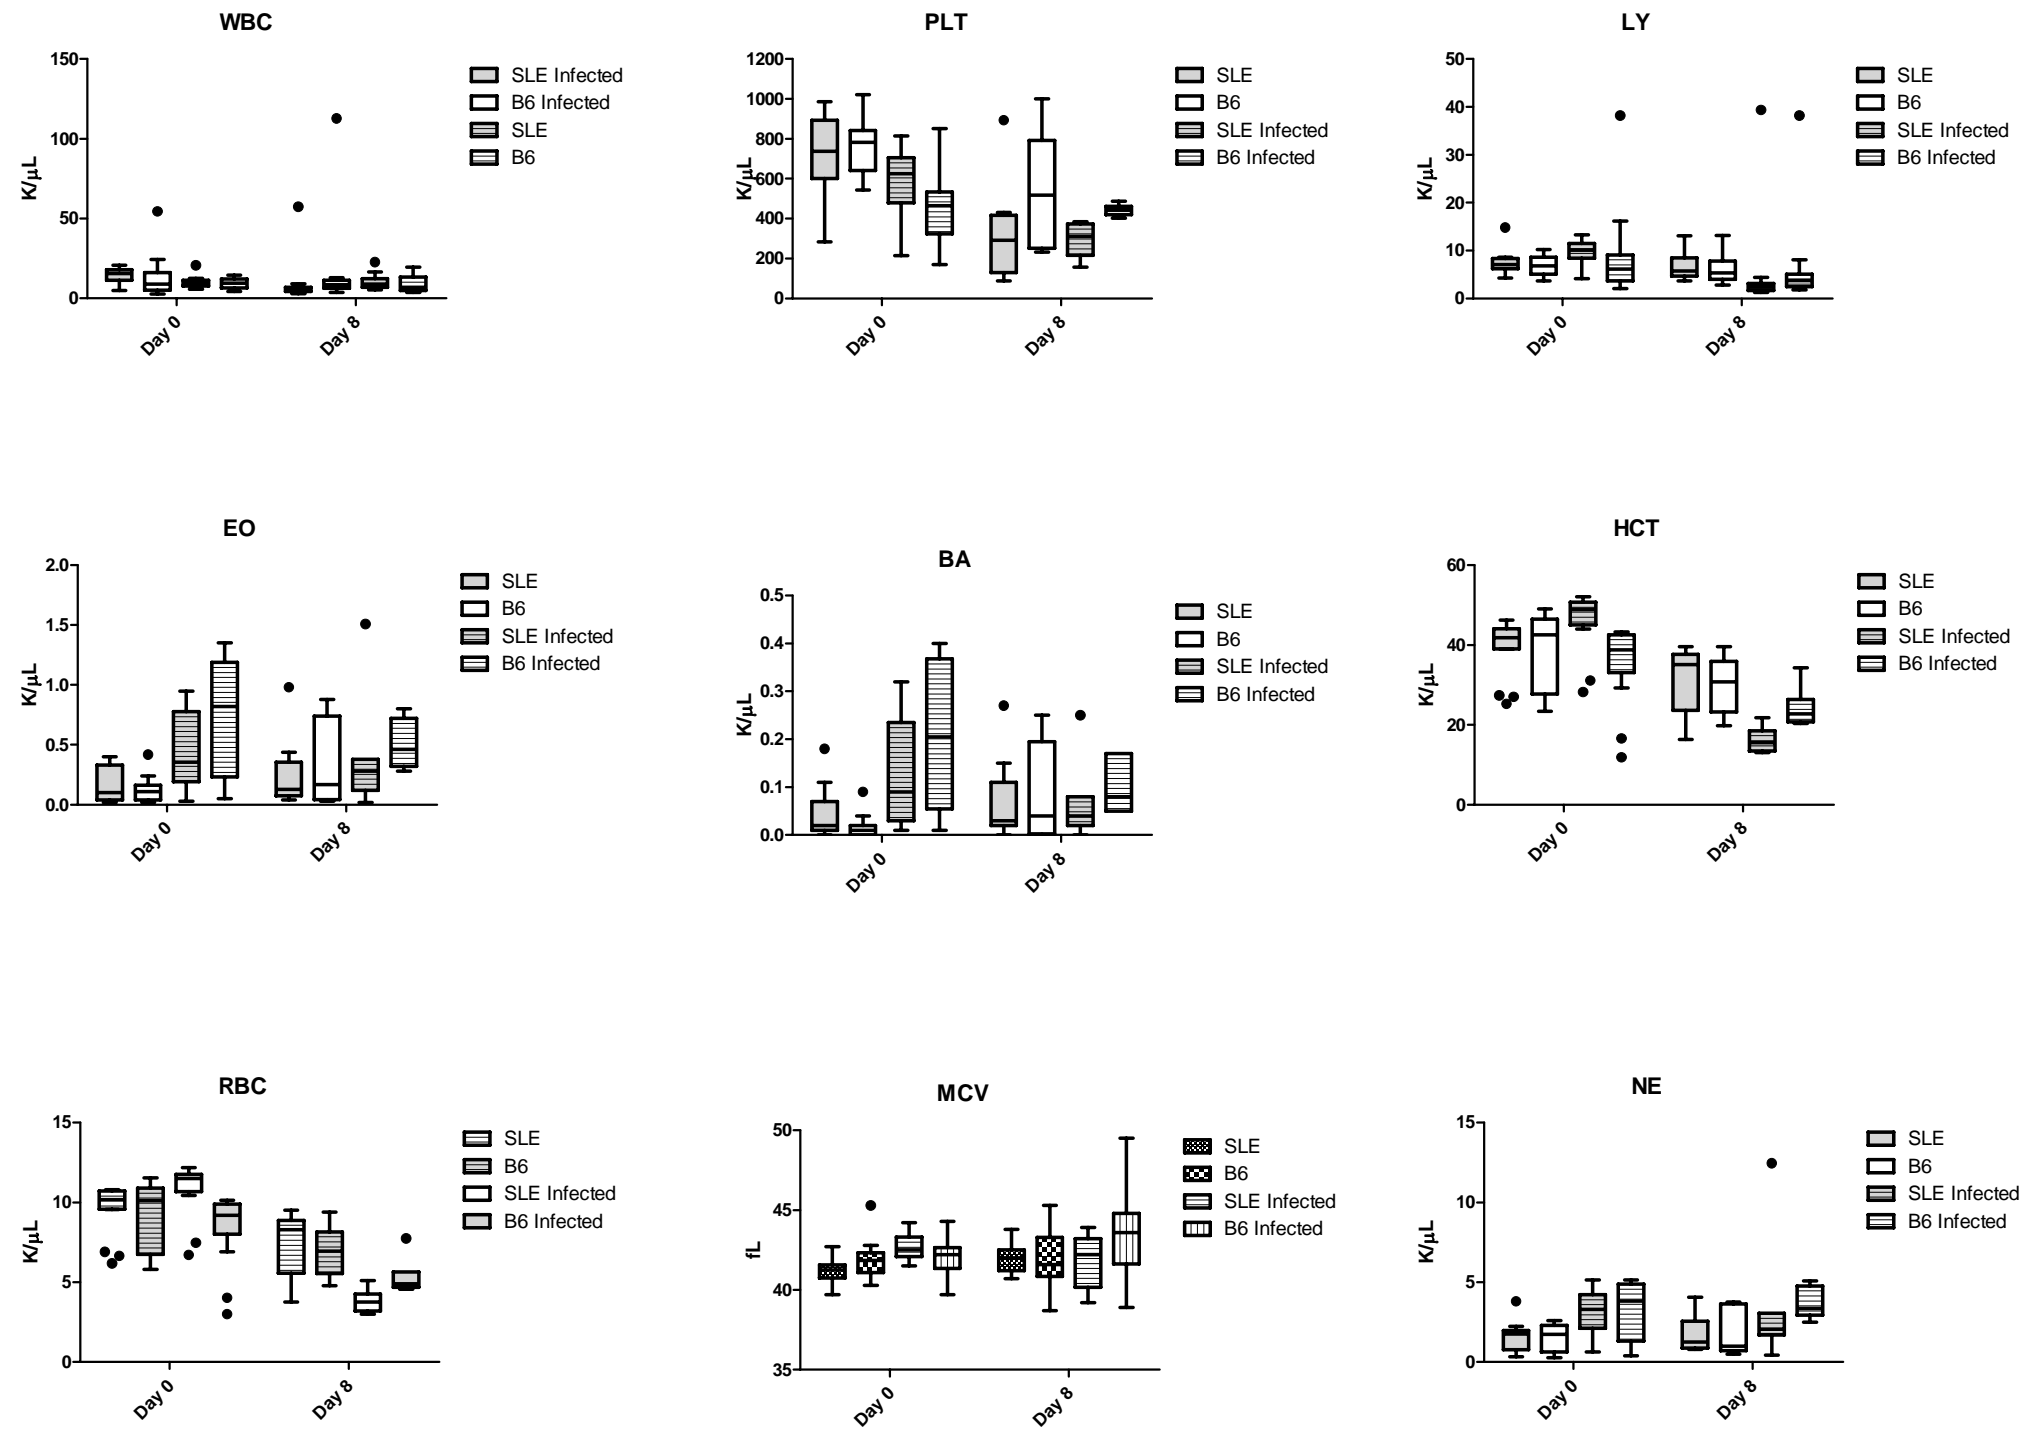

Supplement: pone.0062820.s001.pdf [file pone.0062820.s001.pdf]
